# Supplementary material for: 1D group V–VI–VII ternary nanowires: moderate band gaps, easy to exfoliate from bulk, and unexpected ferroelectricity
Source: Royal Society of Chemistry journal article supplement (doi:10.1039/d2cp05581c), 2023-01-01
Supplement: d2cp05581c1.pdf [file d2cp05581c1.pdf]

## Electronic supplementary information (ESI) for

### 1D group V-VI-VII ternary nanowires: moderate band gaps, easy to exfoliate from bulk, and unexpected ferroelectricity†

Fumin Zhang,<sup>a,b</sup> Weizhen Chen,<sup>a,b</sup> Yungeng Zhang,<sup>\*a,b</sup> and Huabing Yin<sup>\*a,b</sup>

<sup>a</sup> Joint Center for Theoretical Physics, and Institute for Computational Materials Science, School of Physics and Electronics, Henan University, Kaifeng 475004, China.

<sup>b</sup> International Joint Research Laboratory of New Energy Materials and Devices of Henan Province, School of Physics and Electronics, Henan University, Kaifeng 475004, China.

\* E-mails: [zhygeng511@126.com](mailto:zhygeng511@126.com) and [yhb@henu.edu.cn](mailto:yhb@henu.edu.cn)

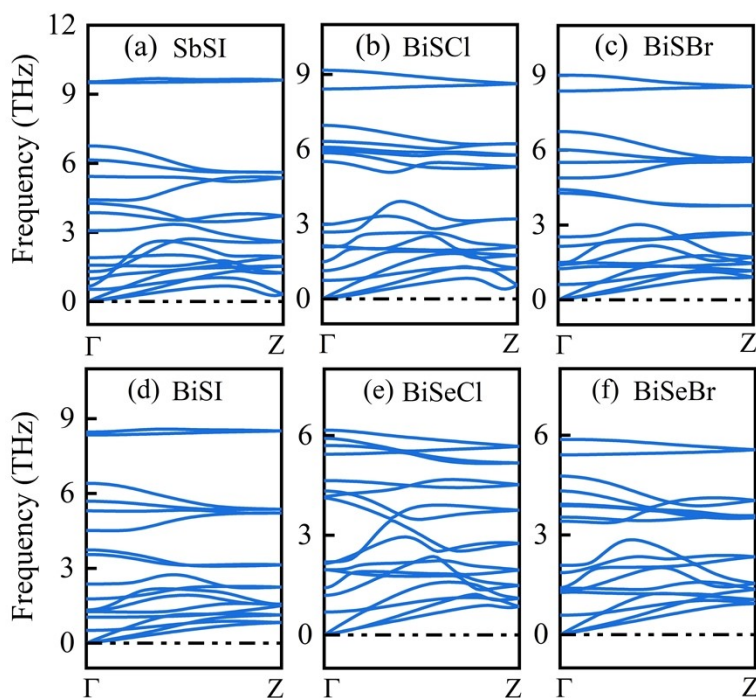

**Fig. S1.** The phonon dispersion spectra of partial 1D  $X^V Y^{VI} Z^{VII}$  nanowires: (a) SbSI, (b) BiSbCl, (c) BiSbBr, (d) BiSI, (e) BiSeCl, and (f) BiSeBr.

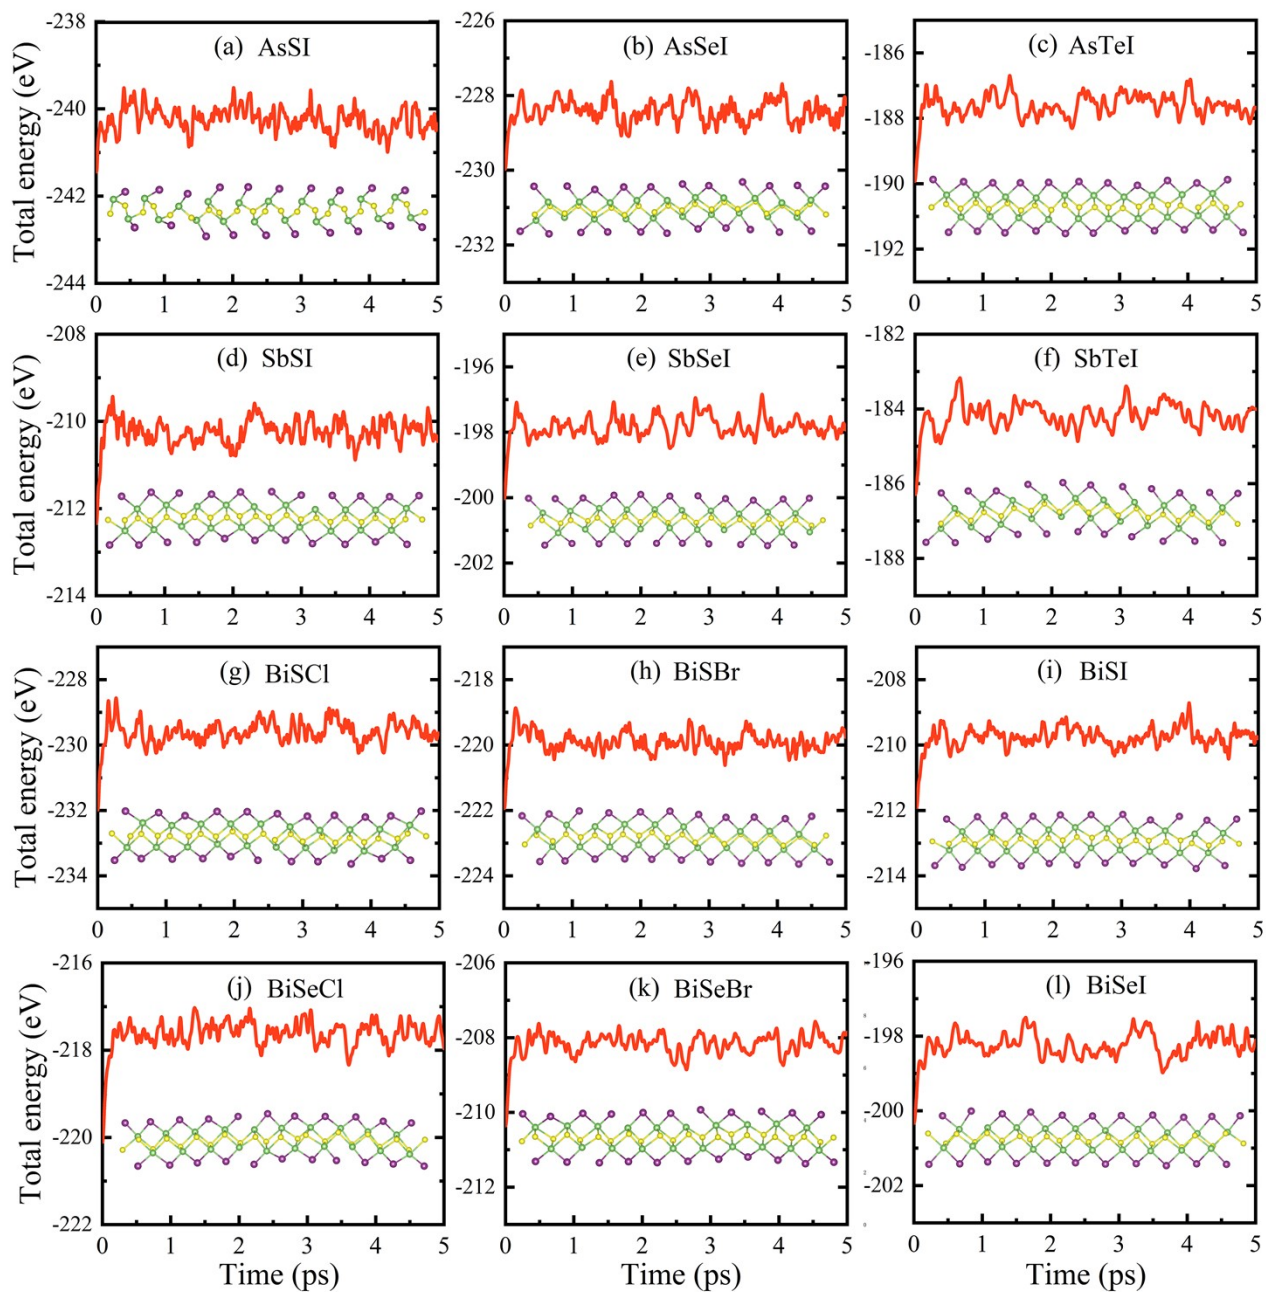

**Fig. S2.** The evolution of energies from AIMD simulations at 300 K of 1D  $X^{\text{V}}Y^{\text{VI}}Z^{\text{VII}}$  nanowires. The insets present the snapshot of atomic structure after 5 ps.

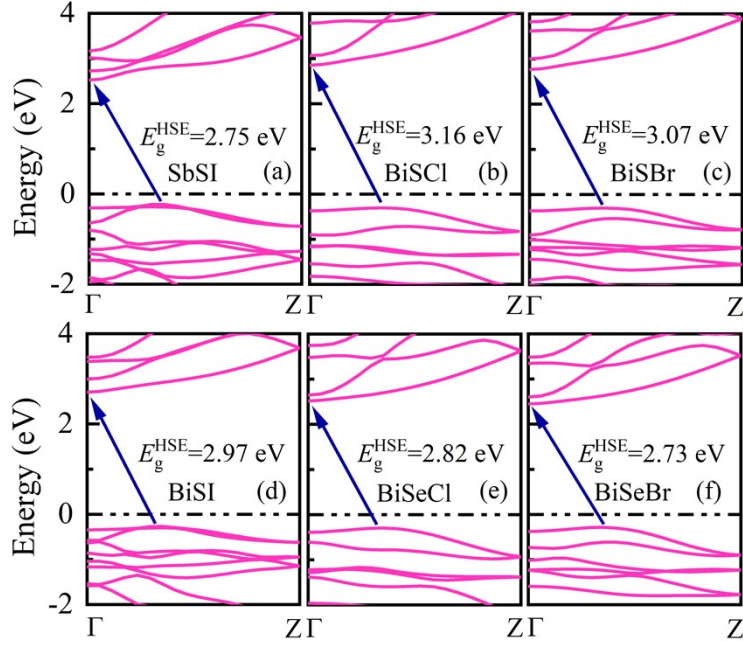

**Fig. S3.** The HSE06 band structures of partial 1D  $X^V Y^VI Z^VII$ : (a) SbSI, (b) BiSbCl, (c) BiSbBr, (d) BiSI, (e) BiSeCl, and (f) BiSeBr. The Fermi level is set to 0.

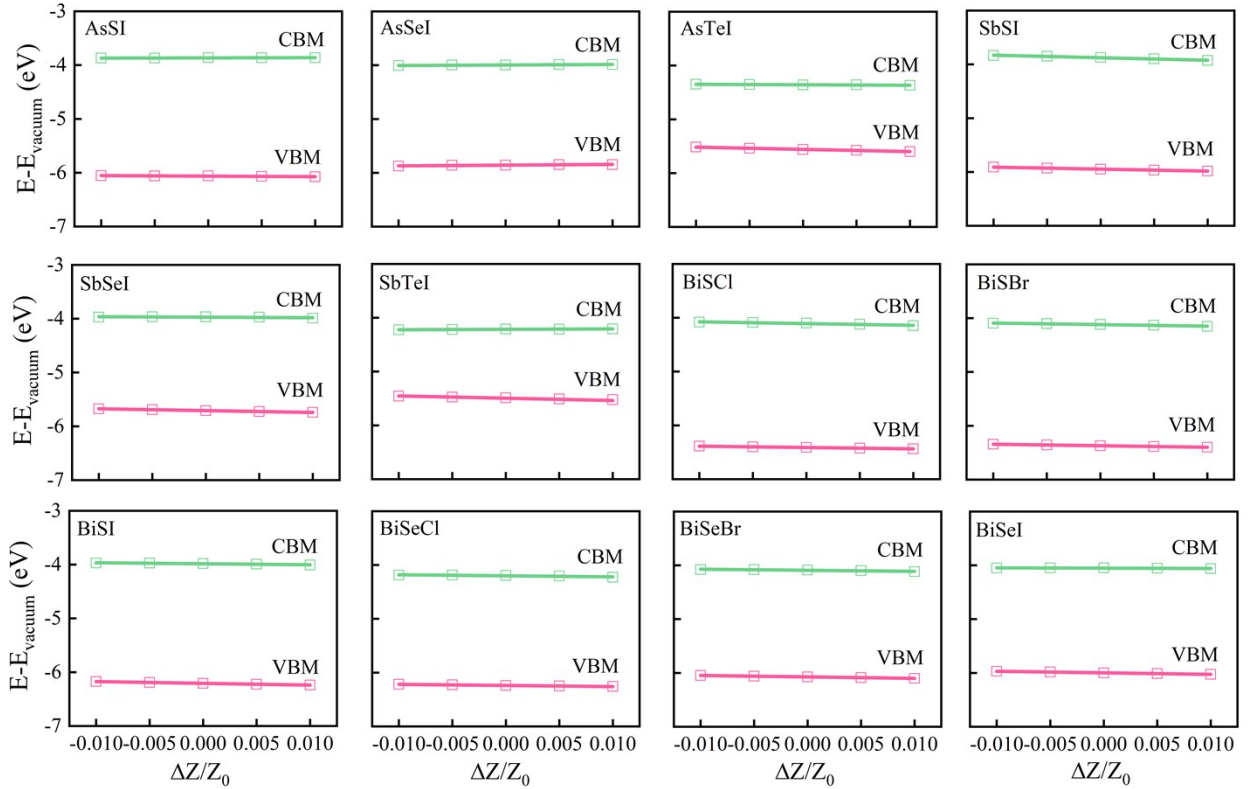

**Fig. S4.** Evaluations of band edges of nanowires 1D  $X^V Y^VI Z^VII$  ( $X=As, Sb, Bi$ ;  $Y=S, Se, Te$ ;  $Z=Cl, Br, I$ ) relative to vacuum level with respect to strains along the chain direction. The slope is the deformation potential  $E_1$ .

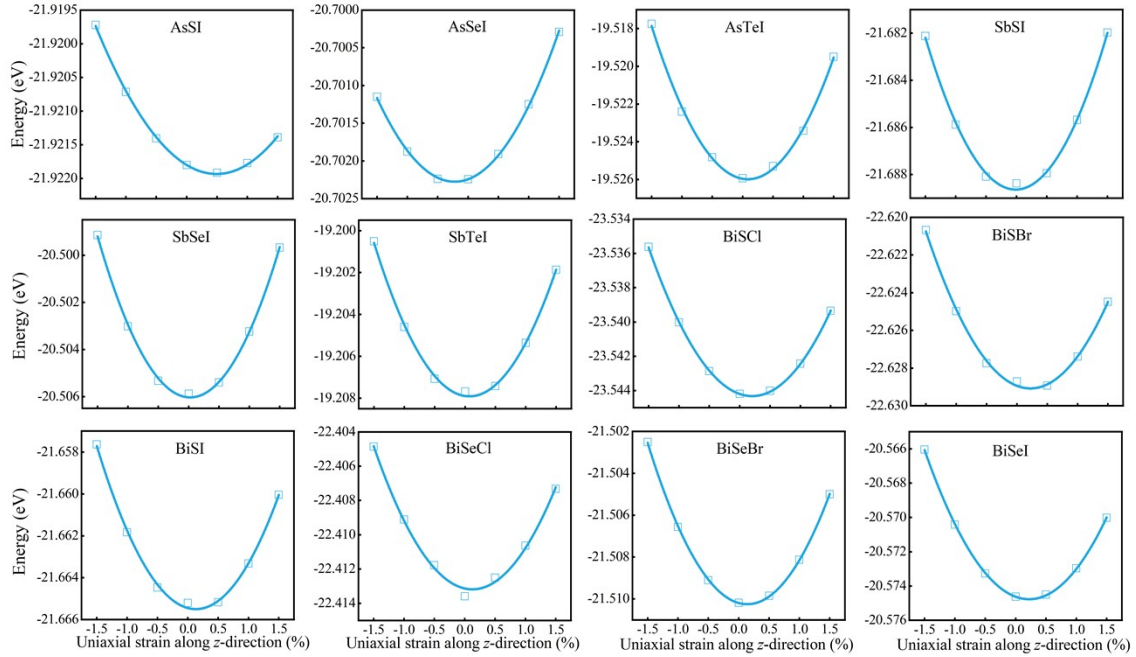

**Fig. S5.** The total energy of 1D  $X^V Y^VI Z^VII$  ( $X=As, Sb, Bi$ ;  $Y=S, Se, Te$ ;  $Z=Cl, Br, I$ ) nanowires as a function of the uniaxial strain applied along the chain direction.

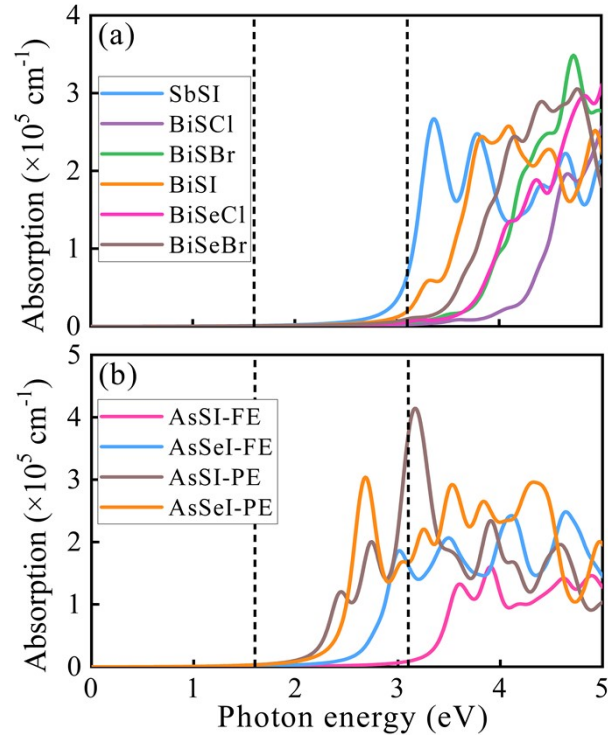

**Fig. S6.** (a) Calculated absorption coefficients of the partial 1D  $X^V Y^VI Z^VII$  nanowires at the HSE06 level: SbSI, BiSbI, BiBrI, BiSI, BiSeCl, and BiSeBr. (b) The comparisons of absorption coefficients between the ferroelectric (FE) and paraelectric (PE) phases for 1D AsSI and AsSeI nanowires. The vertical dashed lines represent the visible region.
